# Supplementary material
Source: MDPI journal article supplement (https://www.mdpi.com/2227-9717/10/8/1657)
Supplement: s1 [file s1]

**Table S1.** Chromatographic characteristics of identified compounds.

| Peak                     | Compound                                 | RT (min) | $\lambda_{\max}$ (nm) |
|--------------------------|------------------------------------------|----------|-----------------------|
| <i>Flavonoids</i>        |                                          |          |                       |
| 1                        | Cyanidin-3-O-sophorose                   | 16.95    | 516                   |
| 2                        | Cyanidin-3-O-glucoside                   | 17.93    | 516                   |
| 3                        | Cyanidin-3-O-rutinoside                  | 18.74    | 516                   |
| 4                        | Pelargonidin-3-O-rutinoside              | 20.25    | 520                   |
| 5                        | Peonidin-3-O-rutinoside                  | 20.79    | 520                   |
| 6                        | Quercetin-3-O-rutinoside-7-O-glucoside   | 25.41    | 344                   |
| 7                        | Kaempferol-3-O-rutinoside-7-O-glucoside  | 25.99    | 350                   |
| 8                        | Quercetin-3-O-galactosyl-rhamnoside      | 33.54    | 355                   |
| 9                        | Quercetin-3-O-rutinoside                 | 34.45    | 354                   |
| 10                       | Quercetin-3-O-glucoside                  | 35.45    | 354                   |
| 11                       | Kaempferol-3-O-rutinoside                | 37.86    | 350                   |
| 12                       | Kaempferol-3-O-glucoside                 | 38.23    | 350                   |
| 13                       | Quercetin-4'-O-glucoside                 | 38.72    | 354                   |
| <i>Hydroxycinnamates</i> |                                          |          |                       |
| 14                       | 5-O-(4'-O-caffeoyl glycosyl)-quinic acid | 10.01    | 298sh, 315            |
| 15                       | <i>trans</i> -3-O-caffeoylquinic acid    | 11.60    | 303sh, 324            |
| 16                       | Caffeic acid hexose I                    | 13.22    | 290, 304sh            |
| 17                       | <i>cis</i> -3-O-coumaroylquinic acid     | 14.84    | 306                   |
| 18                       | <i>trans</i> -3-O-coumaroylquinic acid   | 15.31    | 302sh, 311            |
| 19                       | Caffeic acid hexose II                   | 16.50    | 292, 306sh            |
| 20                       | <i>trans</i> -5-O-caffeoylquinic acid    | 17.03    | 302sh, 326            |
| 21                       | <i>trans</i> -4-O-caffeoylquinic acid    | 17.33    | 292, 324              |
| 22                       | <i>cis</i> -4-O-coumaroylquinic acid     | 18.59    | 295sh, 313            |
| 23                       | <i>cis</i> -5-O-caffeoylquinic acid      | 18.81    | 295sh, 313            |
